# Supplementary material for: Extensive Divergence of Transcription Factor Binding in Drosophila Embryos with Highly Conserved Gene Expression
Source: PLOS journal article supplement (doi:10.1371/journal.pgen.1003748), 2013-09-12

Figure S11

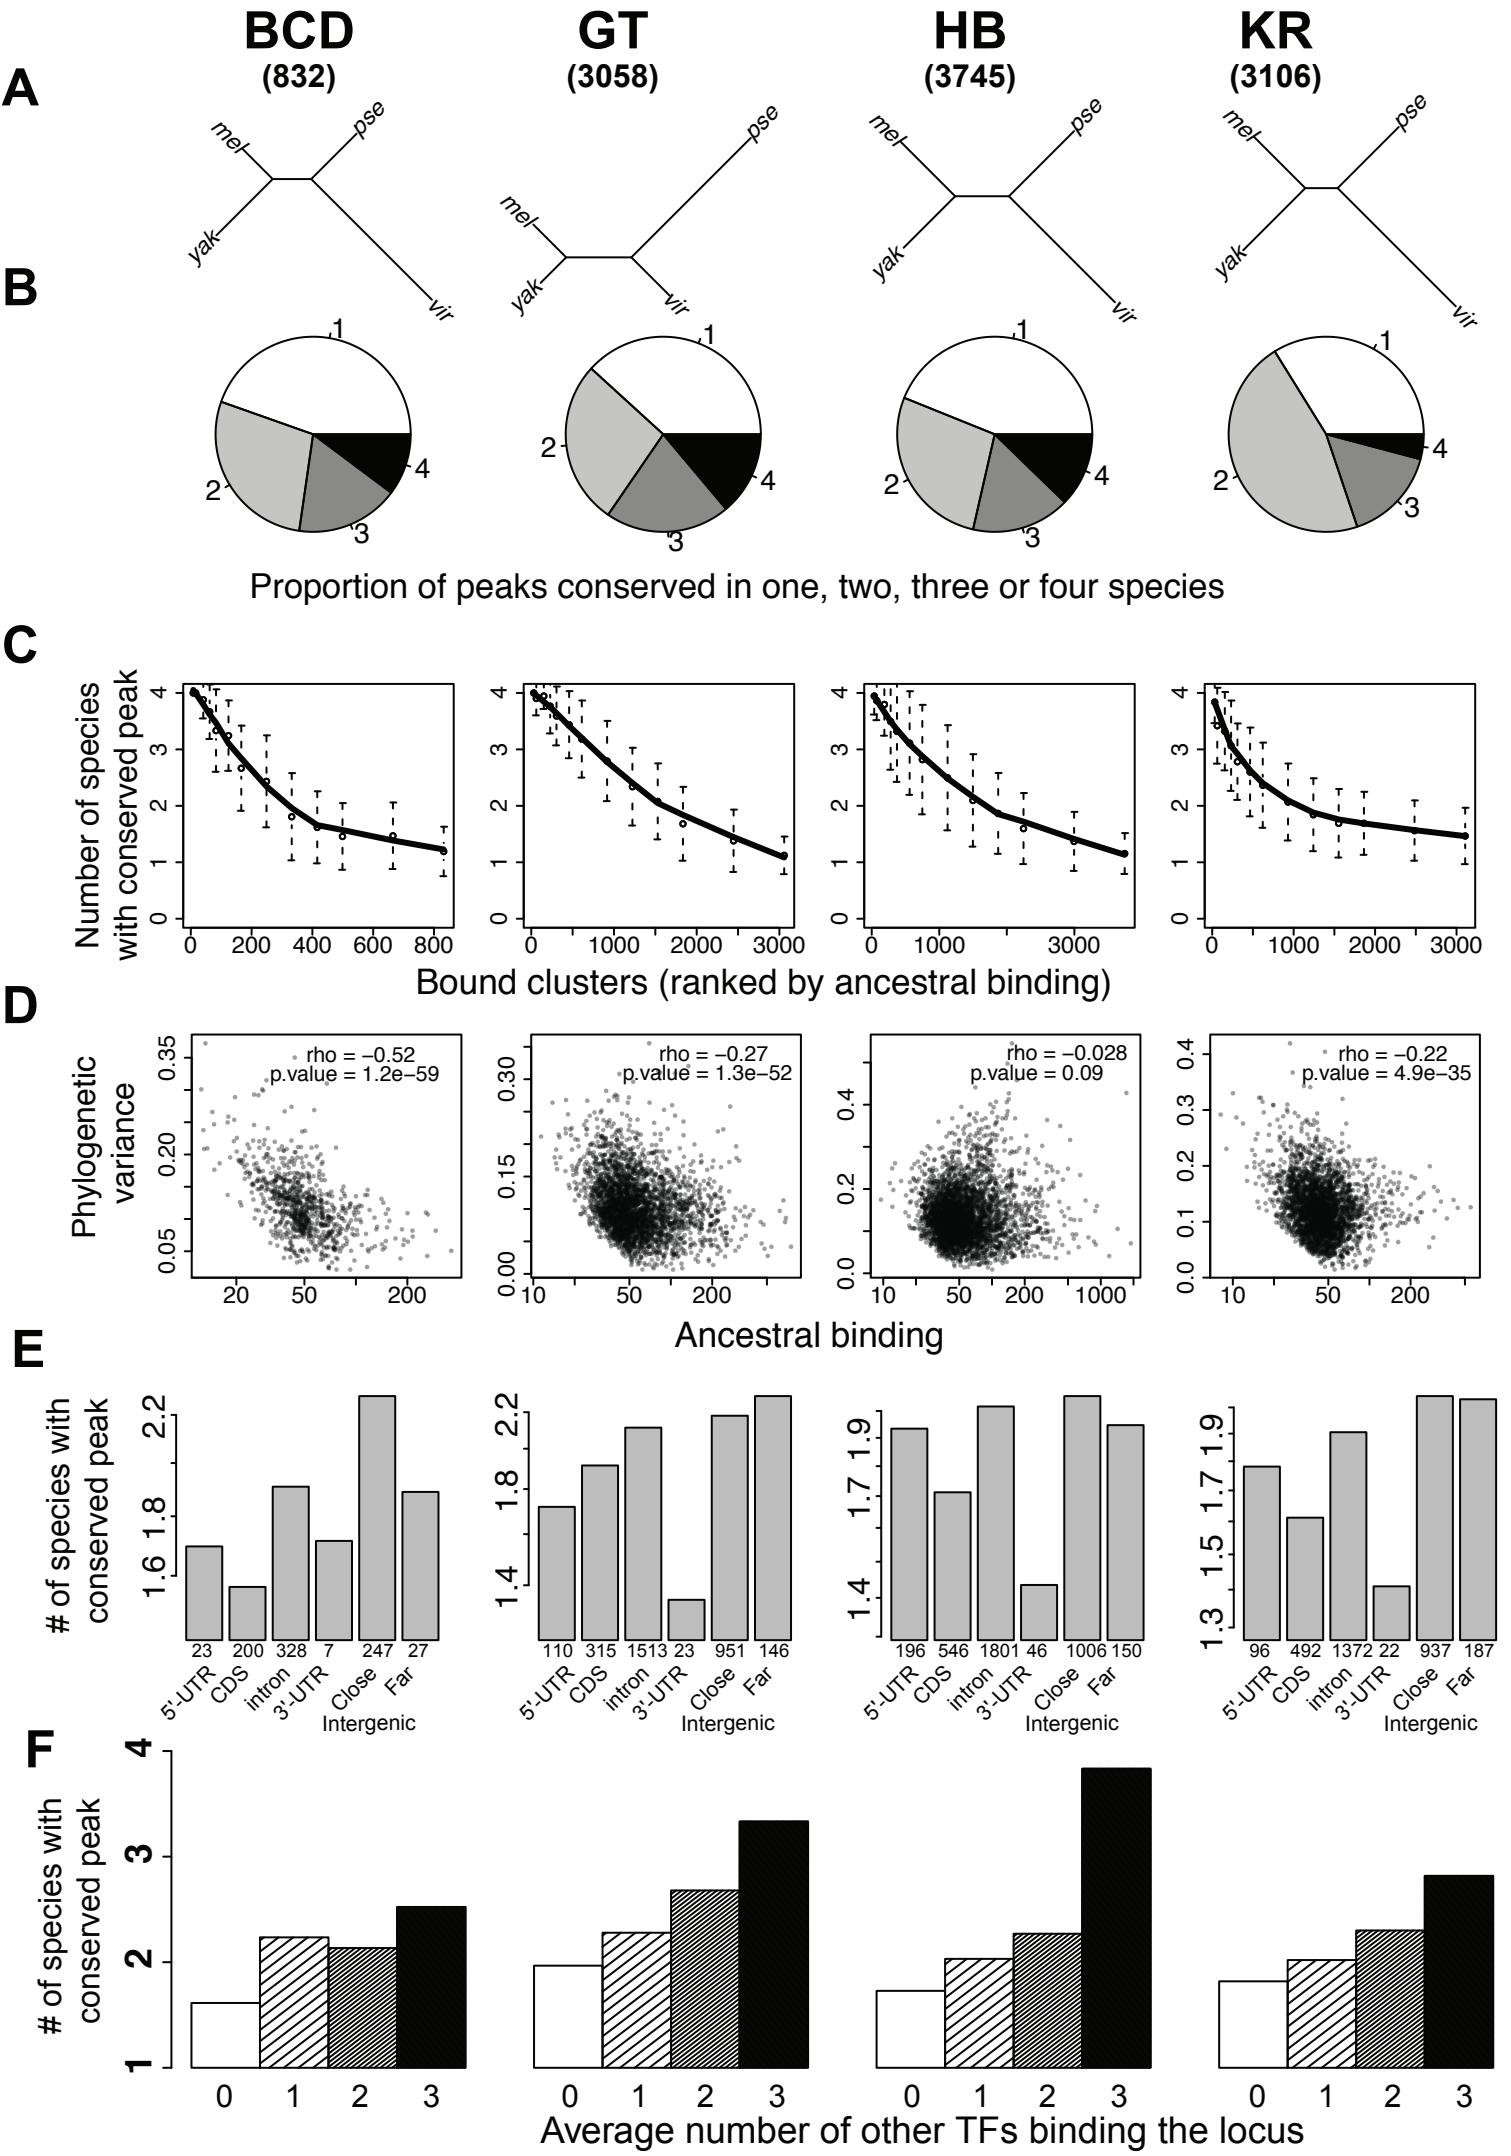

Supplement: S11 (10.1371/journal.pgen.1003748.s011) [file journal.pgen.1003748.s011]
